# Supplementary material for: Influence of oceanic ventilation and terrestrial transport on the atmospheric volatile chlorinated hydrocarbons over the Western Pacific
Source: Copernicus journal article supplement (doi:10.5194/egusphere-2025-251), 2025-02-24
Supplement: Supplementary file 1 [file egusphere-2025-251-supplement.pdf]

**Influence of oceanic ventilation and terrestrial transport on the atmospheric  
volatile chlorinated hydrocarbons over the Western Pacific**

Shan-Shan Liu <sup>a, b, 1</sup>, Jie Ni <sup>a, 1</sup>, Jin- Ming Song<sup>b</sup>, Xu-Xu Gao <sup>a</sup>, Zhen He <sup>a, c, \*</sup>,

Gui-Peng Yang <sup>a, c, d, \*\*</sup>

<sup>a</sup> Frontiers Science Center for Deep Ocean Multispheres and Earth System, and Key  
Laboratory of Marine Chemistry Theory and Technology, Ministry of Education,  
Ocean University of China, Qingdao 266100, China

<sup>b</sup> Key Laboratory of Marine Ecology and Environmental Sciences, Institute of  
Oceanology, Chinese Academy of Sciences, Qingdao 266071, China

<sup>c</sup> Laboratory for Marine Ecology and Environmental Science, Qingdao Marine  
Science and Technology Center, Qingdao 266237, China

<sup>d</sup> Institute of Marine Chemistry, Ocean University of China, Qingdao 266100, China

---

<sup>1</sup> Shan-Shan Liu and Jie Ni contributed equally to the paper.

\* Corresponding author. Key Laboratory of Marine Chemistry Theory and Technology, Ministry of Education, Ocean University of China, Qingdao 266100, China

\*\* Corresponding author. Institute of Marine Chemistry, Ocean University of China, Qingdao 266100, China

E-mail addresses: [zhenhe@ouc.edu.cn](mailto:zhenhe@ouc.edu.cn) (Z. He), [gpyang@mail.ouc.edu.cn](mailto:gpyang@mail.ouc.edu.cn) (G.-P. Yang)

13 **Contents of this file:**

14 **1. Text S1**

15 **2. Figures: S1-S8**

16 **3. Table: S1**

17 **1. Text S1 Oceanographic characteristics of the Western Pacific**

18 As shown in Fig. 1B, the North Equatorial Current (NEC) in the central western  
19 Pacific is a broad easterly current located between 9°N and 18°N. It is characterized  
20 by high temperature, high salinity, high transparency, and low nutrient content. The  
21 NEC bifurcates off the coast of the Philippines into the poleward-flowing Kuroshio  
22 Current (KC) and the equatorward-flowing Mindanao Current. The KC continues  
23 eastward, becoming the Kuroshio Extension as it interacts with the low-salinity,  
24 high-nutrient waters of the Oyashio Current along Japan's east coast, forming the  
25 Kuroshio-Oyashio Extension (KOE). In the equatorial Pacific, the Equatorial  
26 Undercurrent flows swiftly eastward, creating a narrow band of saline, oxygen-rich  
27 water. As the region with the most precipitation, highest seawater temperature, and  
28 most active air-sea exchanges, the Western Pacific Warm Pool (WPWP) is crucial to  
29 the global climate system.

30 As shown in Fig. S1, sea surface temperature (SST) gradually increased from  
31 north to south, with the highest temperatures appearing near the equator. The North  
32 Pacific Subtropical Gyre (NPSG) area, dominated by the NEC, had a higher surface  
33 salinity than the WPWP. The WPWP strongly influences equatorial waters. These  
34 waters also receive heavy rainfall (up to 2 m annually), causing sharp decreases in  
35 surface salinity. The presence of high temperatures, high salinities, and low nutrient  
36 levels at depths of 50 to 250 m near the equator and between 12°N and 22°N were  
37 indicative of the influence of the Equatorial Undercurrent and the North Equatorial

38 Subsurface Current (Fig. S2). In higher-latitude seas, the Oyashio Current, carrying  
39 cold, fresh, nutrient-rich water, merges with the warm, saline, oligotrophic Kuroshio  
40 Intermediate Water, creating a distinct demarcation in subsurface temperature, salinity,  
41 dissolved oxygen, and nutrient levels.

42

## 2. Figures: S1-S8

**Fig. S1.** Horizontal distributions of temperature (a), salinity (b), Chl-*a* (c), CHCl<sub>3</sub> (d), CCl<sub>4</sub> (e), C<sub>2</sub>HCl<sub>3</sub> (f), and CH<sub>3</sub>CCl<sub>3</sub> (g) in surface seawater of the Western Pacific.

**Fig. S2.** Vertical profiles of temperature, salinity, Chl-*a*, and nutrients at depths of 0–200 m in the Western Pacific.

**Fig. S3.** 96 h back trajectories of air masses over the Western Pacific. The ensembled 96 h back-trajectories are within the lower troposphere above 10 m (red lines), above 100 m (blue lines), and above 1000 m (green lines).

**Fig. S4.** Linear correlations between the atmospheric mixing ratios of SF<sub>6</sub> and those of CHCl<sub>3</sub> (a) and C<sub>2</sub>HCl<sub>3</sub> (b) in the Western Pacific.

**Fig. S5.** Linear correlations between the Chl-*a* concentration and atmospheric mixing ratios of CHCl<sub>3</sub> (a) and C<sub>2</sub>HCl<sub>3</sub> (b) in the KOE area.

**Fig. S6.** (a) Interannual variations of wind speed (m/s) and SST (°C) in the study area and global interannual variability of CCl<sub>4</sub> in 2019. (b) Interannual variability of CCl<sub>4</sub> for 2019 in the GSN. (c) Interannual variability of CCl<sub>4</sub> from October 2020 to September 2021 in the SDZ. Wind speed data were sourced from the ERA5 dataset by Hersbach et al. (2020), and SST data were derived from ECCO2 cube92 dataset by Menemenlis et al. (2008). The CCl<sub>4</sub> data for the GSN were obtained from AGAGE network (<https://agage.mit.edu/>), and the CCl<sub>4</sub> data for the SDZ were derived from Yi et al. (2023).

**Fig. S7.** Relationship between the sea-air fluxes of CH<sub>3</sub>CCl<sub>3</sub> (a) and CCl<sub>4</sub> (b) and wind speed and atmospheric concentrations of CH<sub>3</sub>CCl<sub>3</sub> and CCl<sub>4</sub> (points are colored according to atmospheric concentrations).

**Fig. S8.** Relationship between the sea-air fluxes of CH<sub>3</sub>CCl<sub>3</sub> (a) and CCl<sub>4</sub> (b) and

67 wind speed and SST (points are colored according to SST).

68

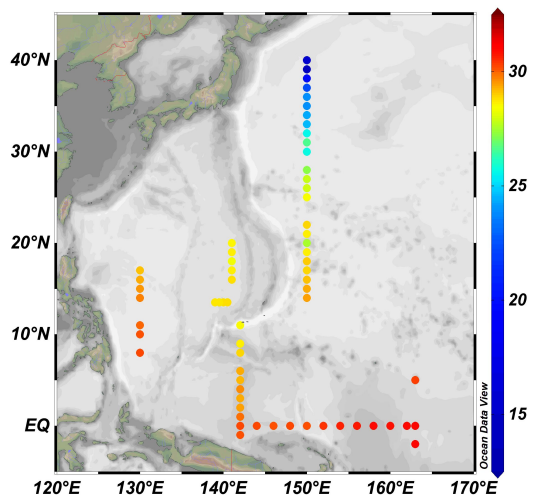

(a) Temperature ( $^{\circ}\text{C}$ )

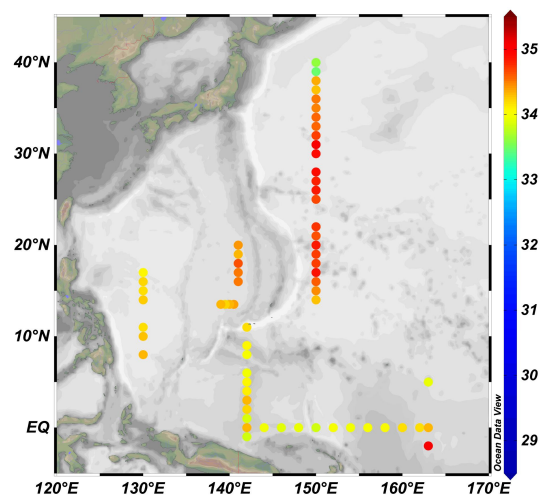

(b) Salinity

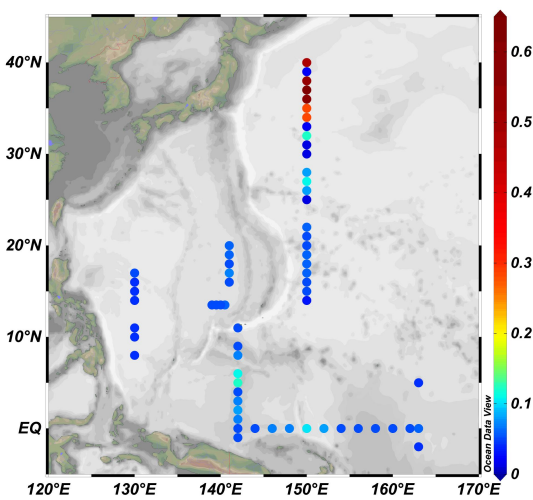

(c) Chl- $a$  ( $\mu\text{g}\cdot\text{L}^{-1}$ )

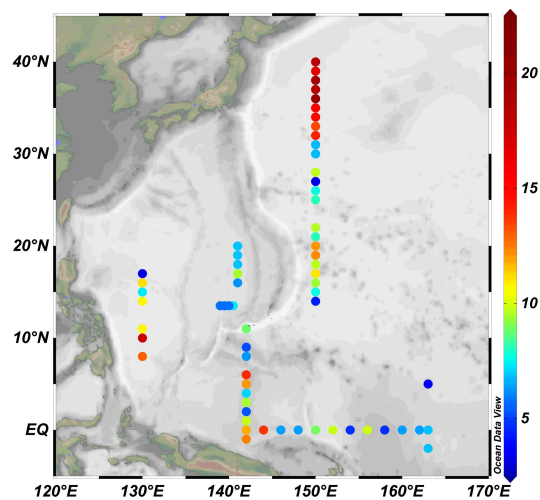

(d)  $\text{CHCl}_3$  ( $\text{pmol L}^{-1}$ )

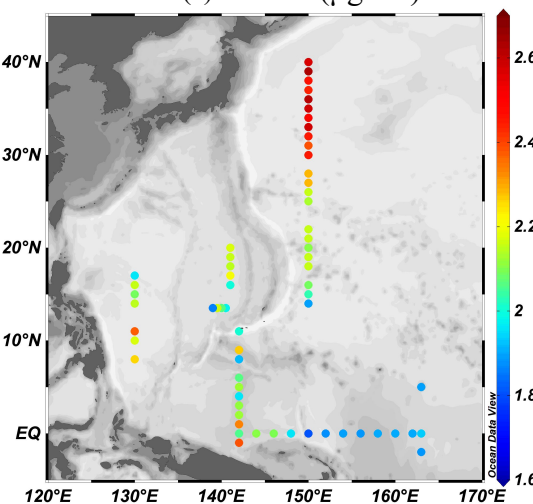

(e)  $\text{CCl}_4$  ( $\text{pmol L}^{-1}$ )

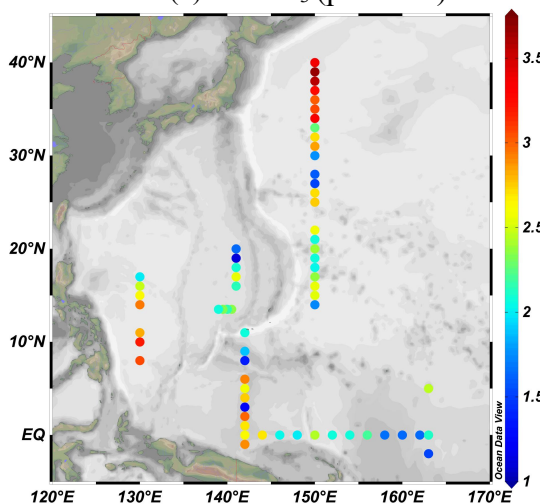

(f)  $\text{C}_2\text{HCl}_3$  ( $\text{pmol L}^{-1}$ )

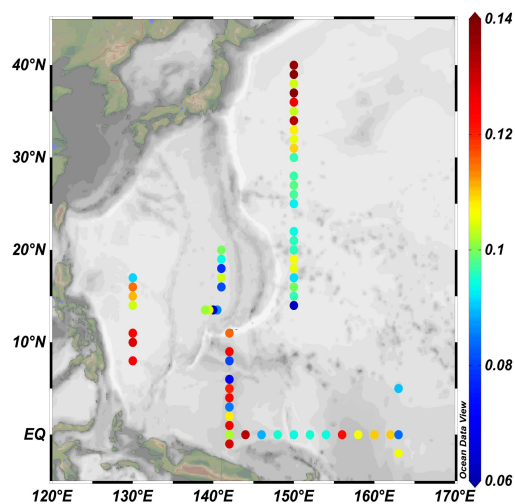

(g)  $\text{CH}_3\text{CCl}_3$  ( $\text{pmol L}^{-1}$ )

**Fig. S1.** Horizontal distributions of temperature (a), salinity (b), Chl-*a* (c),  $\text{CHCl}_3$  (d),  $\text{CCl}_4$  (e),  $\text{C}_2\text{HCl}_3$  (f), and  $\text{CH}_3\text{CCl}_3$  (g) in surface seawater of the Western Pacific.

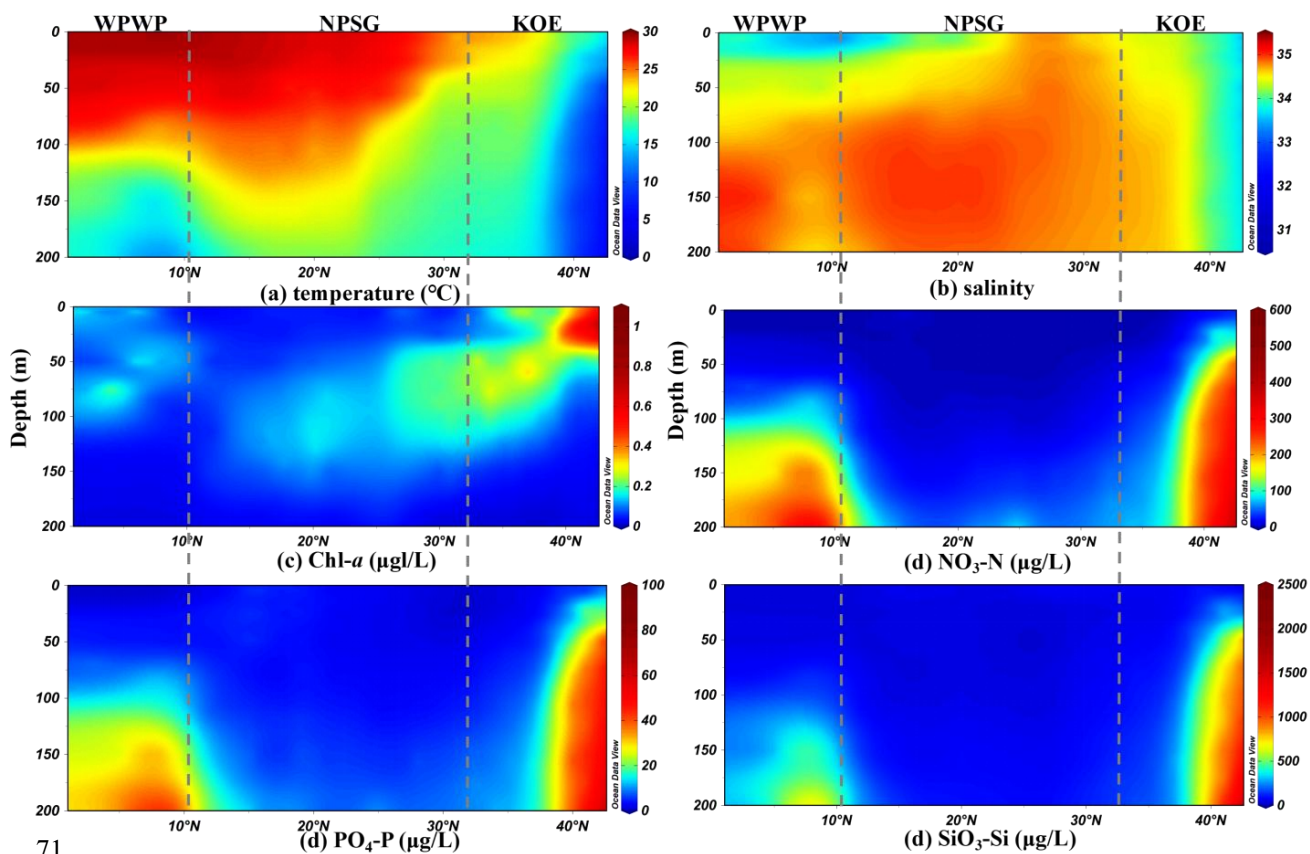

**Fig. S2.** Vertical profiles of temperature, salinity, Chl-*a*, and nutrients at depths of 0–200 m in the Western Pacific.

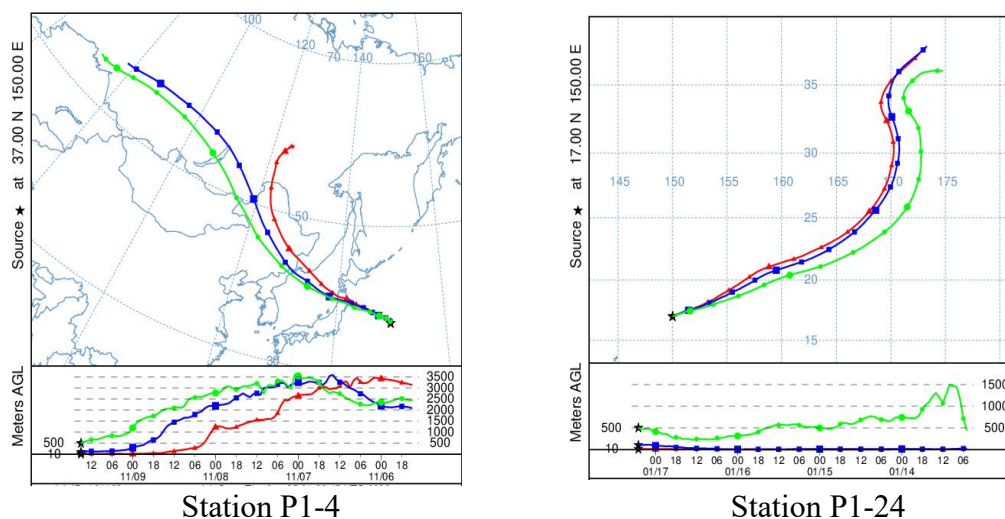

**Fig. S3.** 96 h back trajectories of air masses over the Western Pacific. The ensembled 96 h back-trajectories are within the lower troposphere above 10 m (red lines), above 100 m (blue lines), and above 1000 m (green lines).

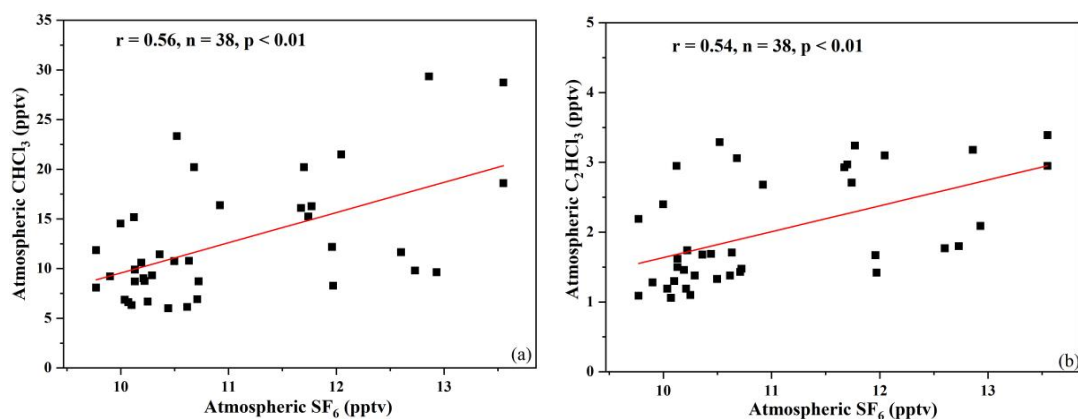

**Fig. S4.** Linear correlations between the atmospheric mixing ratios of  $\text{SF}_6$  and those of  $\text{CHCl}_3$  (a) and  $\text{C}_2\text{HCl}_3$  (b) in the Western Pacific.

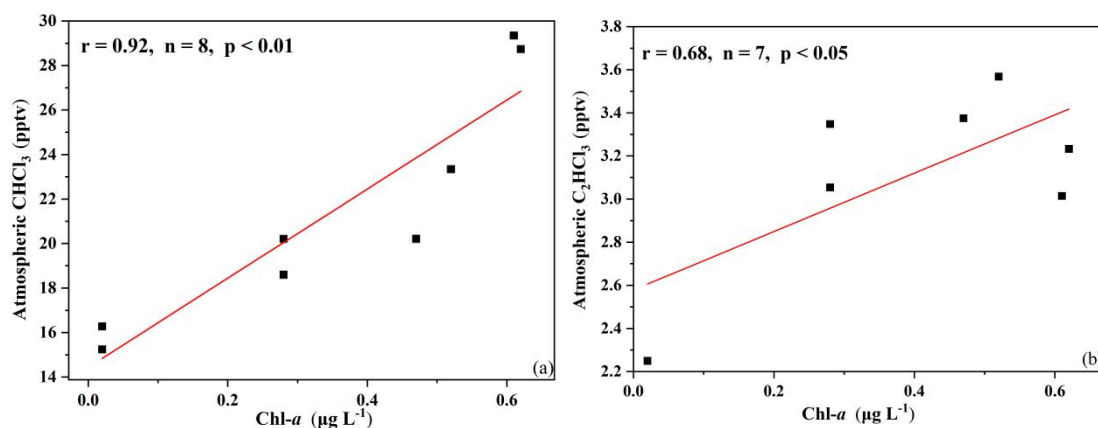



82 **Fig. S5.** Linear correlations between the Chl-*a* concentration and atmospheric mixing  
83 ratios of  $\text{CHCl}_3$  (a) and  $\text{C}_2\text{HCl}_3$  (b) in the KOE  
84 area.

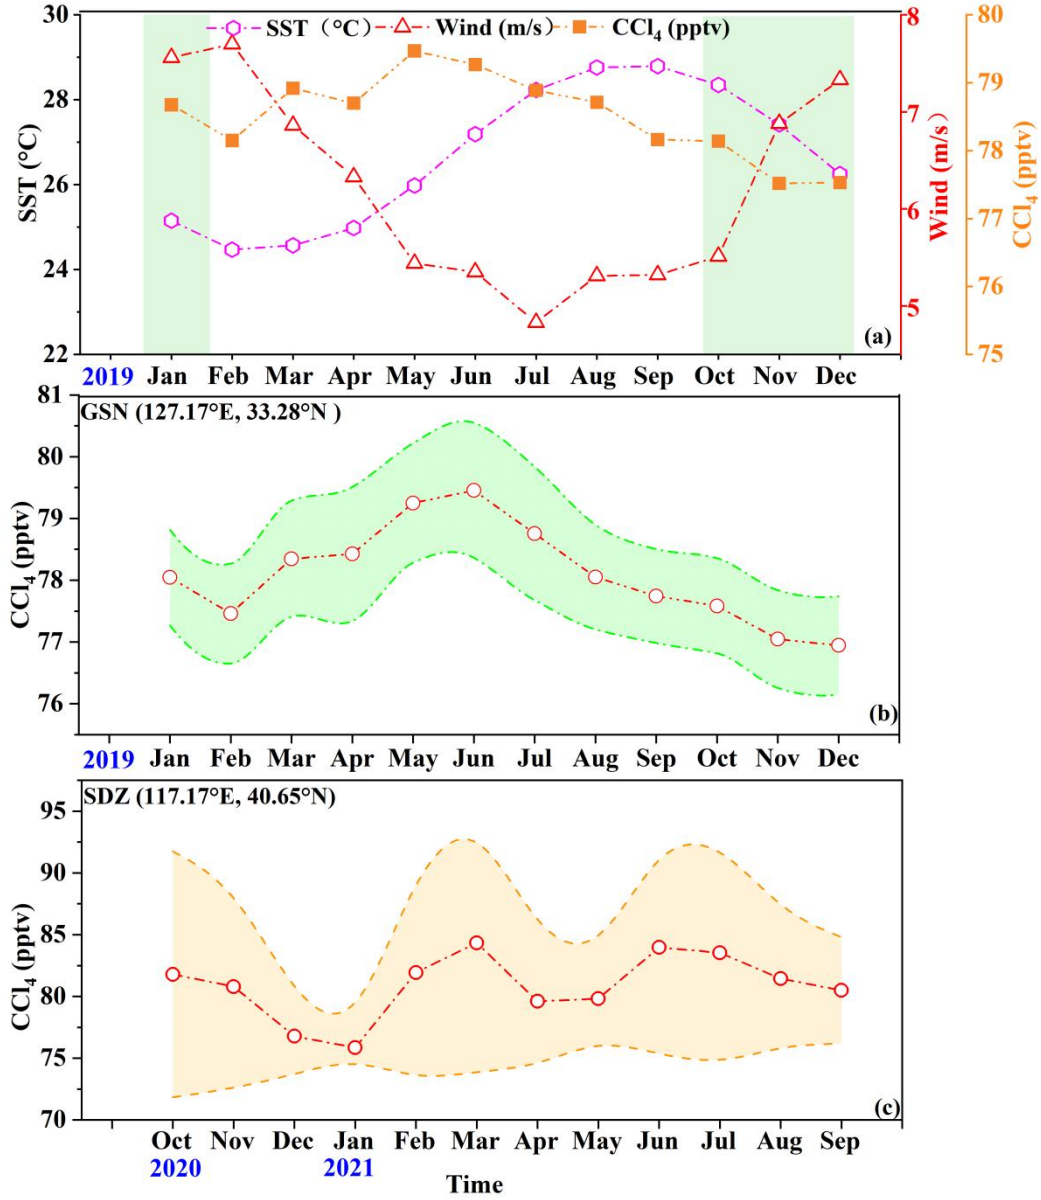

85 **Fig. S6.** (a) Interannual variations of wind speed (m/s) and SST (°C) in the study area  
86 and global interannual variability of  $\text{CCl}_4$  in 2019. (b) Interannual variability of  $\text{CCl}_4$   
87 for 2019 in the GSN. (c) Interannual variability of  $\text{CCl}_4$  from October 2020 to  
88 September 2021 in the SDZ. Wind speed data were sourced from the ERA5 dataset by  
89 Hersbach et al. (2020), and SST data were derived from ECCO2 cube92 dataset by  
90

Menemenlis et al. (2008). The  $\text{CCl}_4$  data for the GSN were obtained from AGAGE network (<https://agage.mit.edu/>), and the  $\text{CCl}_4$  data for the SDZ were derived from Yi et al. (2023).

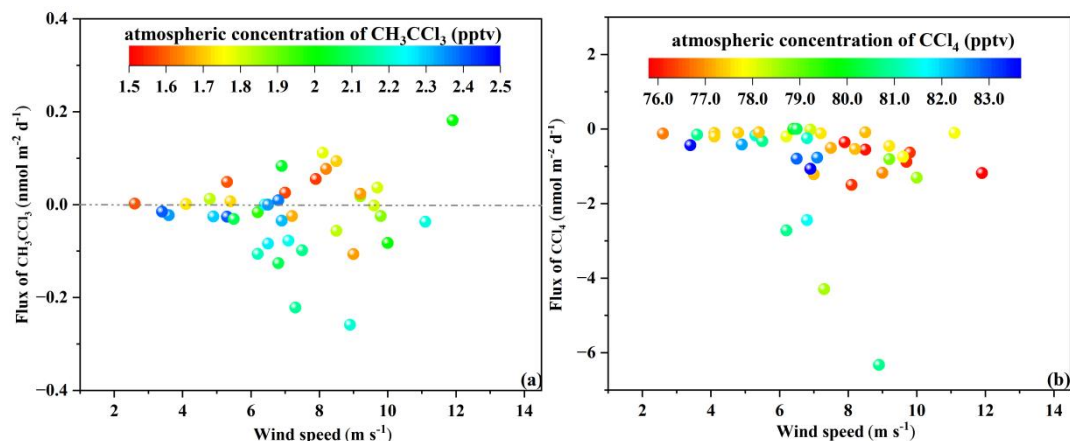

**Fig. S7.** Relationship between the sea-air fluxes of  $\text{CH}_3\text{CCl}_3$  (a) and  $\text{CCl}_4$  (b) and wind speed and atmospheric concentrations of  $\text{CH}_3\text{CCl}_3$  and  $\text{CCl}_4$  (points are colored according to atmospheric concentrations).

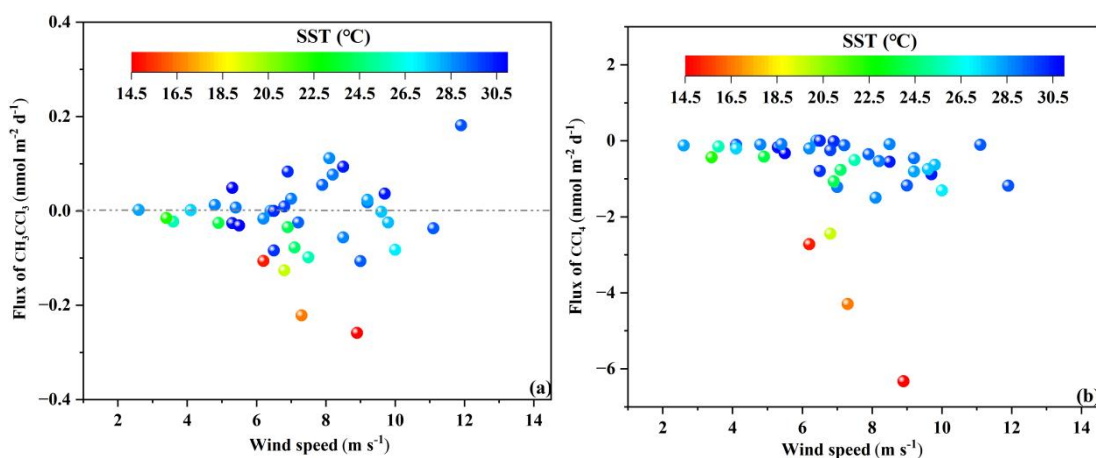

**Fig. S8.** Relationship between the sea-air fluxes of  $\text{CH}_3\text{CCl}_3$  (a) and  $\text{CCl}_4$  (b) and wind speed and SST (points are colored according to SST).

### 3. Table: S1

**Table S1** Method detection limits (MDL), precision, and atmospheric lifetimes of the selected VCHCs.

| Compound                         | Atmosphere (pptv) |               | Seawater (pmol L <sup>-1</sup> ) |               | Lifetime <sup>a</sup> |
|----------------------------------|-------------------|---------------|----------------------------------|---------------|-----------------------|
|                                  | MDL               | Precision (%) | MDL                              | Precision (%) |                       |
| CHCl <sub>3</sub>                | 0.50              | 5             | 0.50                             | 3             | 178 days              |
| C <sub>2</sub> HCl <sub>3</sub>  | 0.10              | 3             | 0.20                             | 9             | 5.6 days              |
| CH <sub>3</sub> CCl <sub>3</sub> | 0.20              | 6             | 0.05                             | 5             | 5 years               |
| CCl <sub>4</sub>                 | 1.00              | 4             | 0.10                             | 7             | 30 years              |

<sup>a</sup> WMO (2022)
